# Supplementary material for: Impact of fluoride for hydroxide substitution on the magnetic properties of a Co-based single-ion magnet imbedded in the barium apatite crystal lattice
Source: Royal Society of Chemistry journal article supplement (doi:10.1039/c8ce02042f), 2019-01-01
Supplement: c8ce02042f1.pdf [file c8ce02042f1.pdf]

## Supplementary information

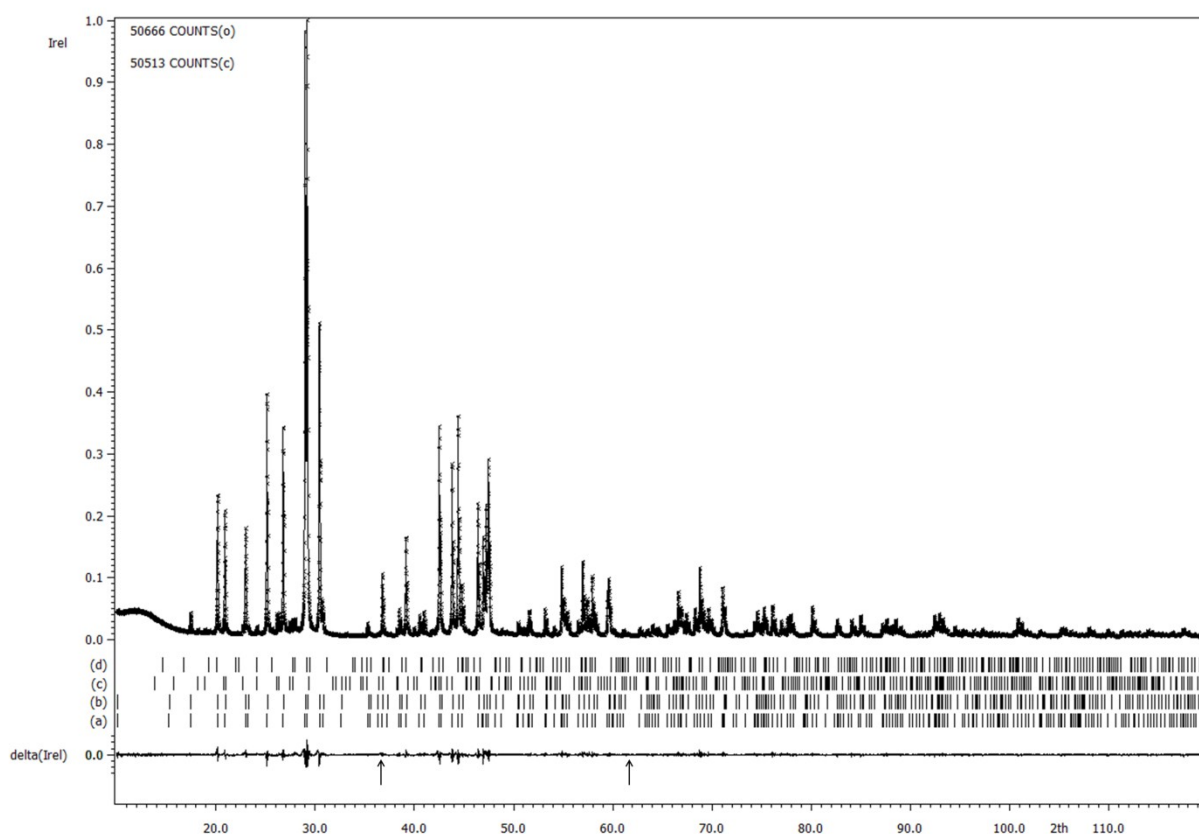

Fig. S1. X-ray powder diffraction patterns of **1**. Observed (crosses), calculated (solid line) and difference (solid line below) plots. Positions of Bragg reflections are shown as strokes underneath: (a)  $\text{CuK}_{\alpha 1}$ , (b)  $\text{CuK}_{\alpha 2}$ , (c)  $\text{CuK}_{\beta 1}$ , and (d)  $\text{WL}_{\alpha 1}$  emission lines. Arrows at the difference plot point to the reflections of the CoO phase impurity.

Table S1. Atomic parameters and thermal displacement parameters ( $\text{\AA}^2$ ) for **1**.  $R_{\text{wp}} = 0.047$ ,  $R_{\text{all}} = 0.013$ .

| Atom                            | Ba(1)      | Ba(2)       | P          | O(1)       | O(2)       | O(3)      | O(4), F  | Co         |
|---------------------------------|------------|-------------|------------|------------|------------|-----------|----------|------------|
| Site                            | 4f         | 6h          | 6h         | 6h         | 6h         | 12i       | 4e       | 12i        |
| SOF                             | 1          | 1           | 1          | 1          | 1          | 1         | 0.3, 0.2 | 0.0112(11) |
| $x$                             | 1/3        | 0.24148(12) | 0.4009(5)  | 0.3389(11) | 0.5768(11) | 0.3436(6) | 0        | 0.039(10)  |
| $y$                             | 2/3        | 0.98073(12) | 0.3687(5)  | 0.4810(10) | 0.4580(11) | 0.2636(6) | 0        | 0          |
| $z$                             | -0.0005(2) | 1/4         | 1/4        | 1/4        | 1/4        | 0.0888(7) | 0.199(3) | 0          |
| $U_{\text{eq}}, U_{\text{iso}}$ | 0.0218(5)  | 0.0230(8)   | 0.0186(14) | 0.020(3)   | 0.023(3)   | 0.023(2)  | 0.048(7) | 0.023      |
| $U_{11}$                        | 0.0233(7)  | 0.0243(10)  |            |            |            |           |          |            |
| $U_{22}$                        | 0.0233(7)  | 0.0188(9)   |            |            |            |           |          |            |
| $U_{33}$                        | 0.0188(8)  | 0.0233(8)   |            |            |            |           |          |            |
| $U_{12}$                        | 0.0117(3)  | 0.0088(9)   |            |            |            |           |          |            |
| $U_{13}$                        | 0          | 0           |            |            |            |           |          |            |
| $U_{23}$                        | 0          | 0           |            |            |            |           |          |            |

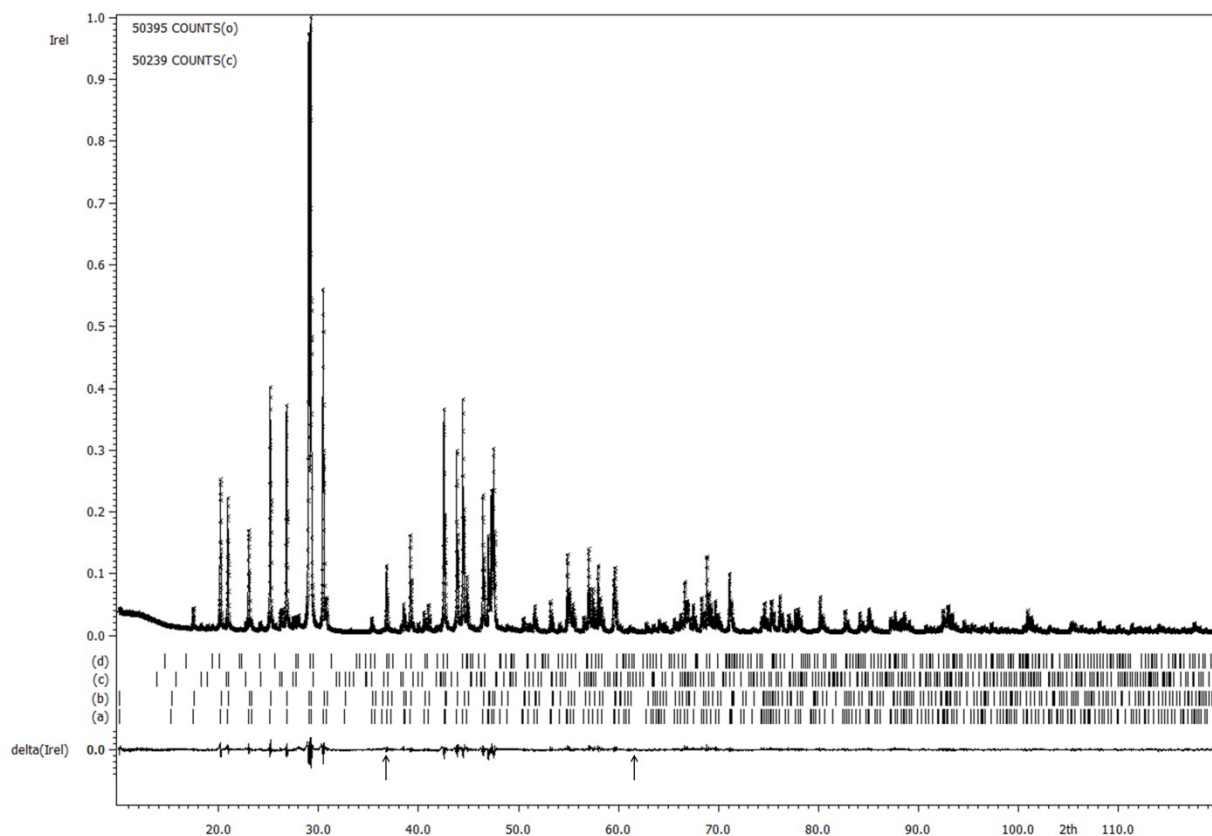

Fig. S2. X-ray powder diffraction patterns of **2**. Observed (crosses), calculated (solid line) and difference (solid line below) plots. Positions of Bragg reflections are shown as strokes underneath: (a)  $\text{CuK}_{\alpha 1}$ , (b)  $\text{CuK}_{\alpha 2}$ , (c)  $\text{CuK}_{\beta 1}$ , and (d)  $\text{WL}_{\alpha 1}$  emission lines. Arrows at the difference plot point to the reflections of the CoO phase impurity.

Table S2. Atomic parameters and thermal displacement parameters ( $\text{\AA}^2$ ) for **2**.  $R_{\text{wp}} = 0.056$ ,  $R_{\text{all}} = 0.019$ .

| Atom                            | Ba(1)      | Ba(2)       | P          | O(1)       | O(2)       | O(3)       | O(4), F   | Co         |
|---------------------------------|------------|-------------|------------|------------|------------|------------|-----------|------------|
| Site                            | 4f         | 6h          | 6h         | 6h         | 6h         | 12i        | 4e        | 12i        |
| SOF                             | 1          | 1           | 1          | 1          | 1          | 1          | 0.2, 0.3  | 0.0105(18) |
| $x$                             | 1/3        | 0.24119(18) | 0.4006(7)  | 0.3406(18) | 0.5806(17) | 0.3410(10) | 0         | 0.045(14)  |
| $y$                             | 2/3        | 0.98075(18) | 0.3699(8)  | 0.4823(15) | 0.4599(16) | 0.2619(10) | 0         | 0          |
| $z$                             | -0.0008(3) | 1/4         | 1/4        | 1/4        | 1/4        | 0.0891(10) | 0.197(3)  | 0          |
| $U_{\text{eq}}, U_{\text{iso}}$ | 0.0201(8)  | 0.0212(11)  | 0.0162(19) | 0.029(5)   | 0.023(5)   | 0.025(3)   | 0.038(10) | 0.023      |
| $U_{11}$                        | 0.0214(10) | 0.0214(15)  |            |            |            |            |           |            |
| $U_{22}$                        | 0.0214(10) | 0.0170(13)  |            |            |            |            |           |            |
| $U_{33}$                        | 0.0177(12) | 0.0221(11)  |            |            |            |            |           |            |
| $U_{12}$                        | 0.0107(5)  | 0.0074(12)  |            |            |            |            |           |            |
| $U_{13}$                        | 0          | 0           |            |            |            |            |           |            |
| $U_{23}$                        | 0          | 0           |            |            |            |            |           |            |

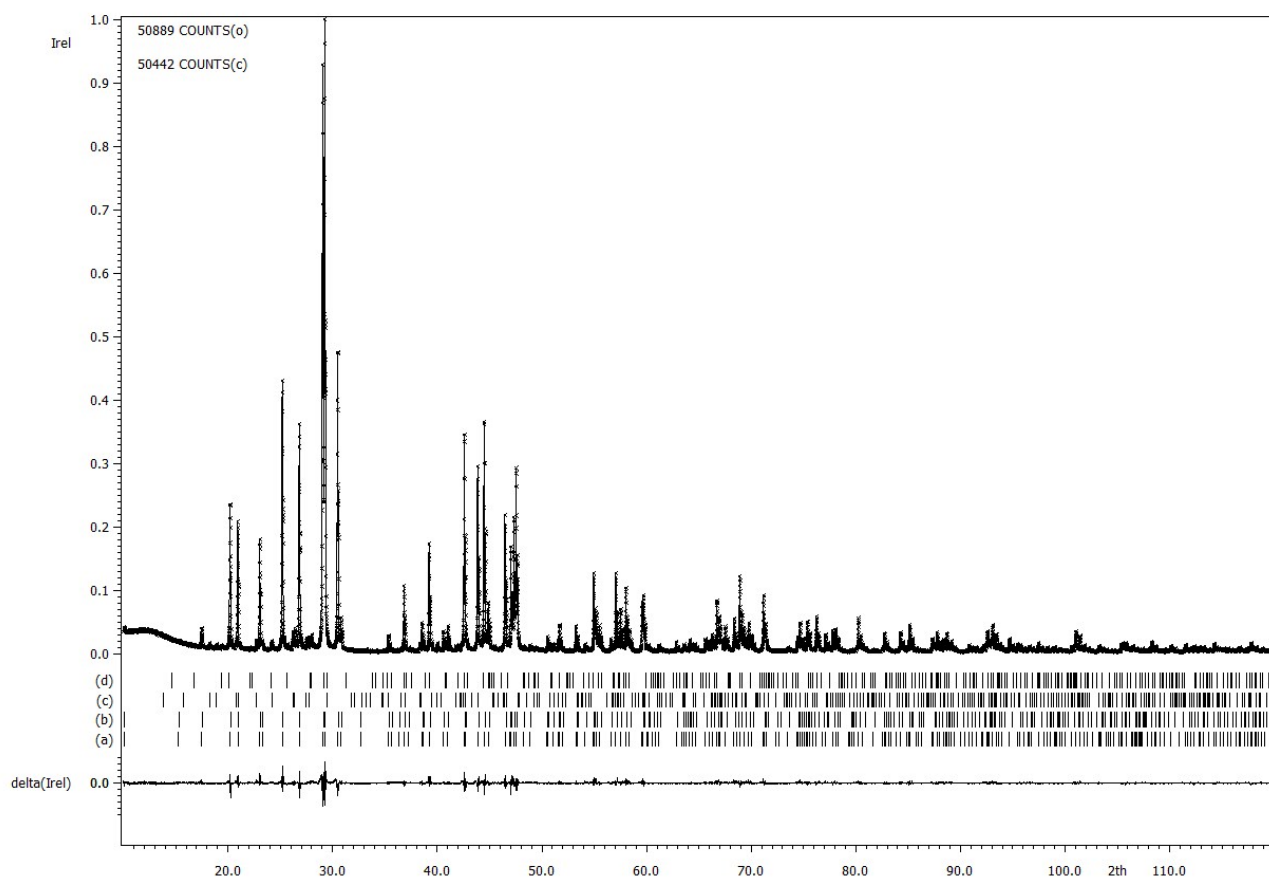

Fig. S3. X-ray powder diffraction patterns of **3**. Observed (crosses), calculated (solid line) and difference (solid line below) plots. Positions of Bragg reflections are shown as strokes underneath: (a)  $\text{CuK}_{\alpha 1}$ , (b)  $\text{CuK}_{\alpha 2}$ , (c)  $\text{CuK}_{\beta 1}$ , and (d)  $\text{WL}_{\alpha 1}$  emission lines.

Table S3. Atomic parameters and thermal displacement parameters ( $\text{\AA}^2$ ) for **3**.  $R_{\text{wp}} = 0.064$ ,  $R_{\text{all}} = 0.020$ .

| Atom                            | Ba(1)      | Ba(2)       | P          | O(1)       | O(2)       | O(3)       | O(4), F    |
|---------------------------------|------------|-------------|------------|------------|------------|------------|------------|
| Site                            | 4f         | 6h          | 6h         | 6h         | 6h         | 12i        | 4e         |
| SOF                             | 1          | 1           | 1          | 1          | 1          | 1          | 0.04, 0.45 |
| $x$                             | 1/3        | 0.23972(18) | 0.4030(7)  | 0.3392(17) | 0.5824(16) | 0.3458(10) | 0          |
| $y$                             | 2/3        | 0.98078(18) | 0.3710(7)  | 0.4836(15) | 0.4634(16) | 0.2637(10) | 0          |
| $z$                             | -0.0010(3) | 1/4         | 1/4        | 1/4        | 1/4        | 0.0898(10) | 0.212(5)   |
| $U_{\text{eq}}, U_{\text{iso}}$ | 0.0195(7)  | 0.0193(11)  | 0.0152(19) | 0.024(5)   | 0.018(5)   | 0.025(3)   | 0.040(11)  |
| $U_{11}$                        | 0.0217(9)  | 0.0214(14)  |            |            |            |            |            |
| $U_{22}$                        | 0.0217(9)  | 0.0188(13)  |            |            |            |            |            |
| $U_{33}$                        | 0.0150(11) | 0.0163(10)  |            |            |            |            |            |
| $U_{12}$                        | 0.0109(5)  | 0.0091(12)  |            |            |            |            |            |
| $U_{13}$                        | 0          | 0           |            |            |            |            |            |
| $U_{23}$                        | 0          | 0           |            |            |            |            |            |

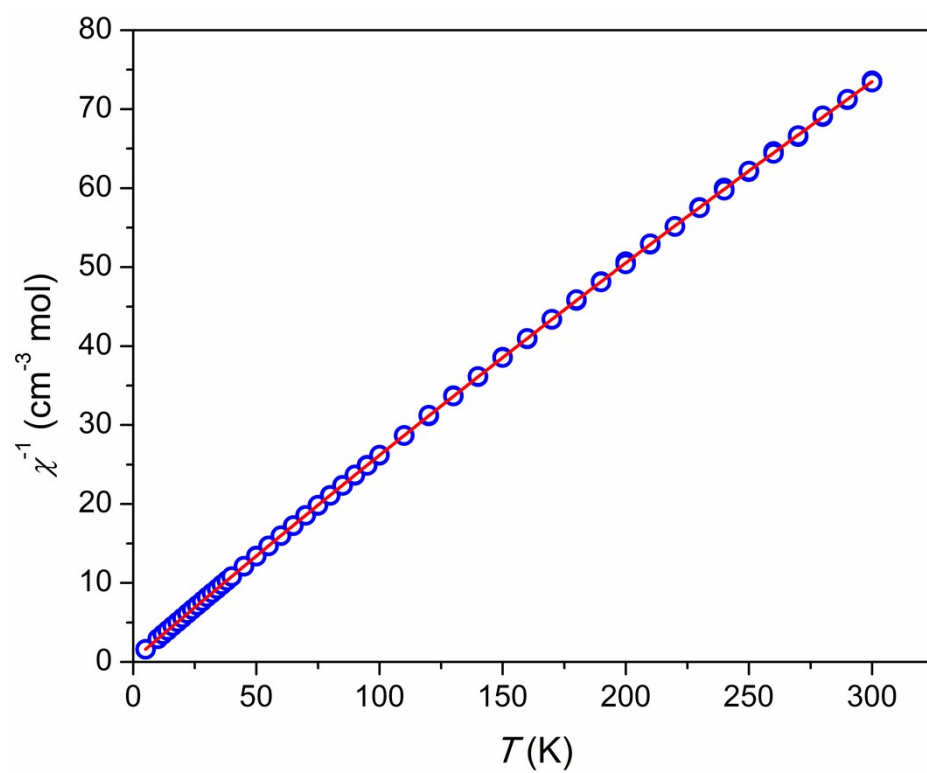

Fig. S4. Temperature dependence of the inversed susceptibility of **3** under a field of 1 kOe.

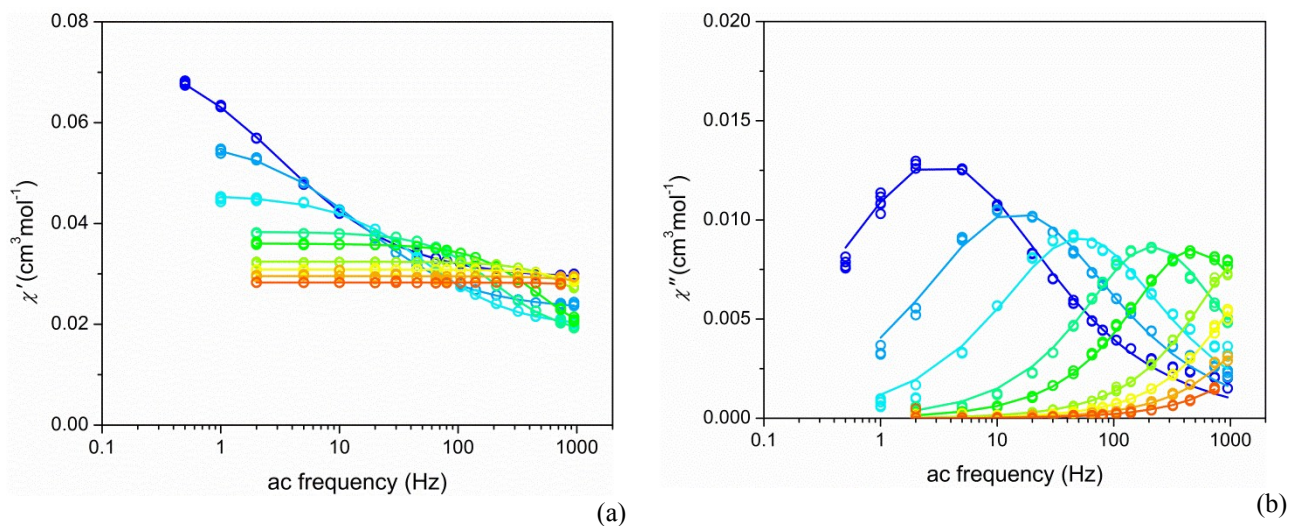

Figure S5. Frequency ( $f$ ) dependence of ac susceptibility per mol of Co under a zero magnetic field for **1**. (a) – in-phase susceptibility  $\chi'$ ; (b) – out-of-phase susceptibility  $\chi''$ . Symbols – experimental points, lines – fitting. The measurement temperature color designation – from blue to orange – 15, 20, 25, 30, 32.5, 36, 38, 40, 42 K.

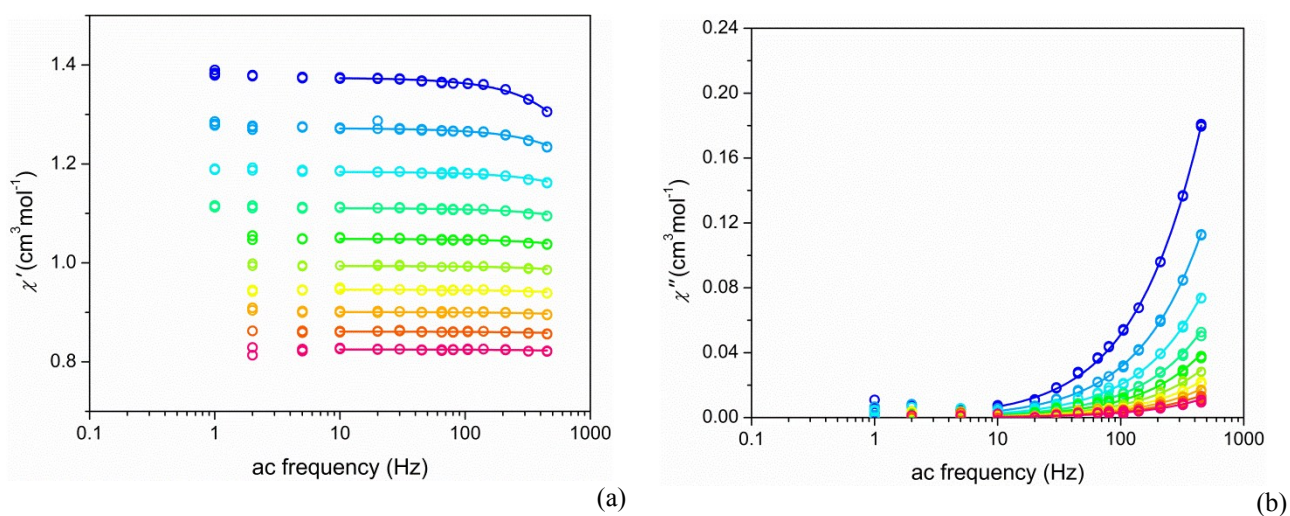

Figure S6. Frequency ( $f$ ) dependence of ac susceptibility per mol of Co under a zero magnetic field for **3**. (a) – in-phase susceptibility  $\chi'$ ; (b) – out-of-phase susceptibility  $\chi''$ . Symbols – experimental points, lines – fitting. The measurement temperature color designation – from blue to carmine-red – 1.8, 2.0, 2.2, 2.4, 2.6, 2.8, 3.0, 3.2, 3.4, 3.6 K.
